# Supplementary material
Source: Springer Nature journal article supplement (https://www.springermedizin.de/resource/supplementary/12889_2011_4097_MOESM1_ESM.pdf/9491872)

# SF12 physical and mental component scores by mental health status

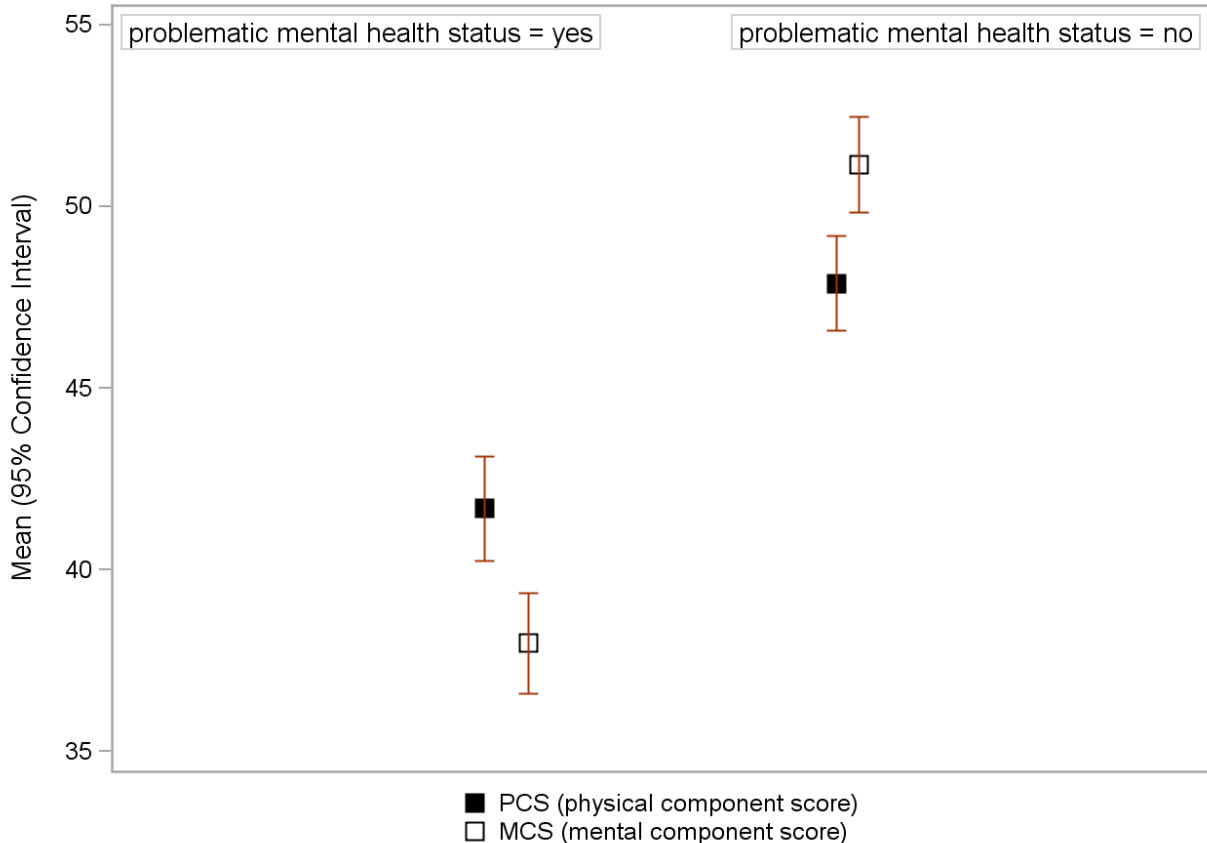

Supplement: MOESM1 [file 9491872]
